# Supplementary material for: Trinuclear and Cyclometallated Organometallic Dinuclear Pt-Pyrazolato Complexes: A Combined Experimental and Theoretical Study
Source: MDPI journal article supplement (doi:10.3390/chemistry5010016), 2023-01-29
Supplement: s1 [file s1]

# **Trinuclear and Cyclometallated Organometallic Dinuclear**

## **Pt-Pyrazolato Complexes:**

### **A Combined Experimental and Theoretical Study**

Zhi-Chun Shi<sup>1</sup>, Fengyu Li<sup>2</sup>, Hong Zhao<sup>2</sup>, Indranil Chakraborty<sup>1</sup>, Zhongfang Chen<sup>2,\*</sup>, Raphael G.  
Raptis<sup>1,\*</sup>

<sup>1</sup> Department of Chemistry & Biochemistry and the Biomolecular Sciences Institute, Florida  
International University, Miami, FL 33199, USA.

<sup>2</sup> Department of Chemistry, University of Puerto Rico, San Juan, PR 00931-3346, Puerto Rico.

#### **Corresponding Author**

\* Email: [zhongfangchen@gmail.com](mailto:zhongfangchen@gmail.com) (Z.C.); [raphael@epscor.upr.edu](mailto:raphael@epscor.upr.edu) (R.G.R)

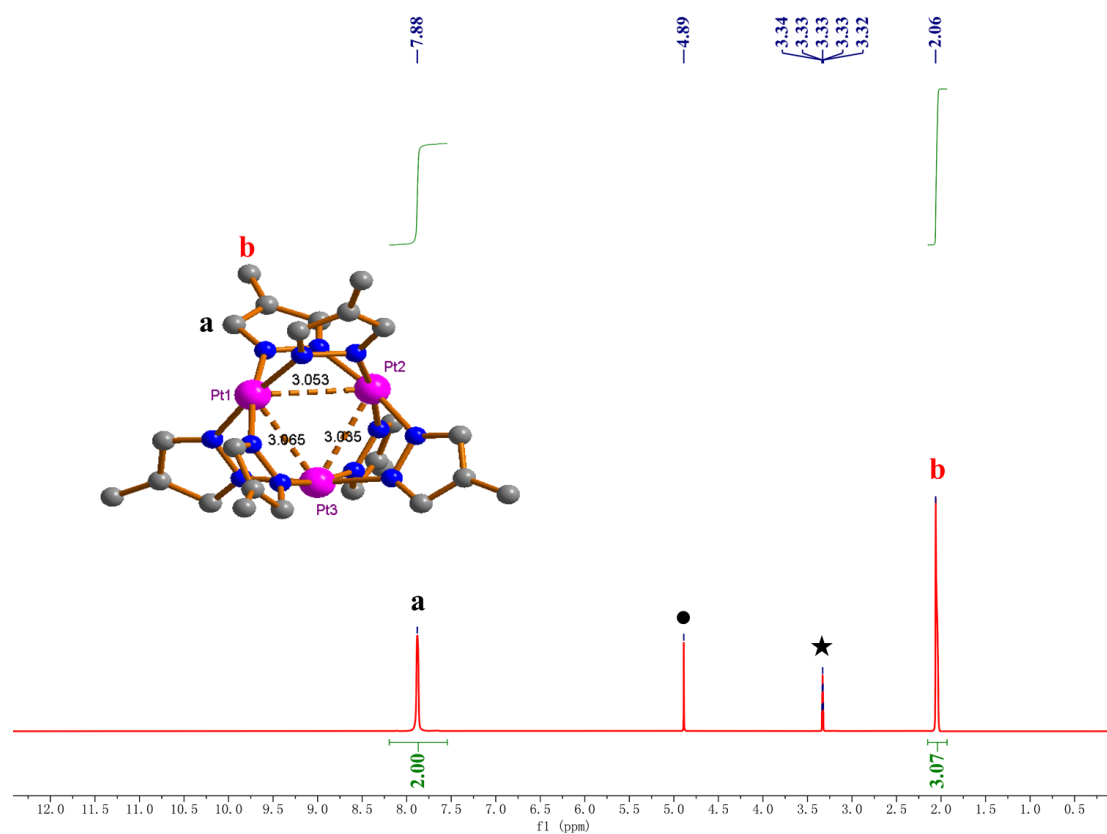

**Figure S1.**  $^1\text{H}$  NMR of **1** in  $\text{CD}_3\text{OD}$  solvent at 293 K. Peaks marked by a solid dot or star identify solvent peaks.

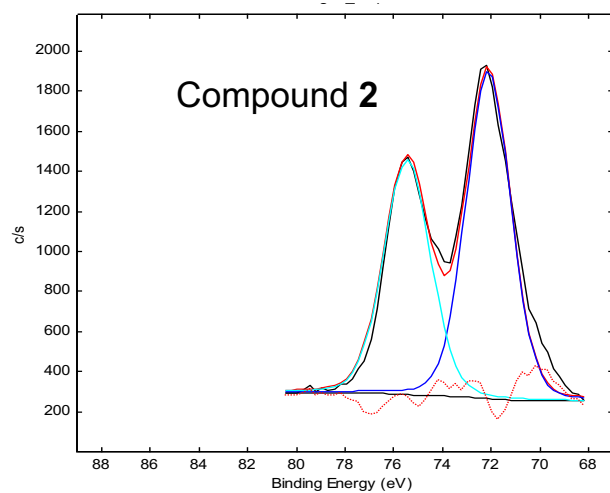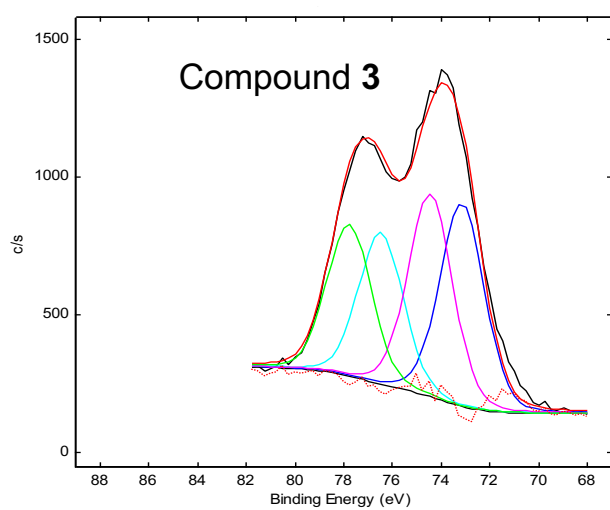

**Figure S2.** XPS spectra of **2** (top) and **3** (bottom).

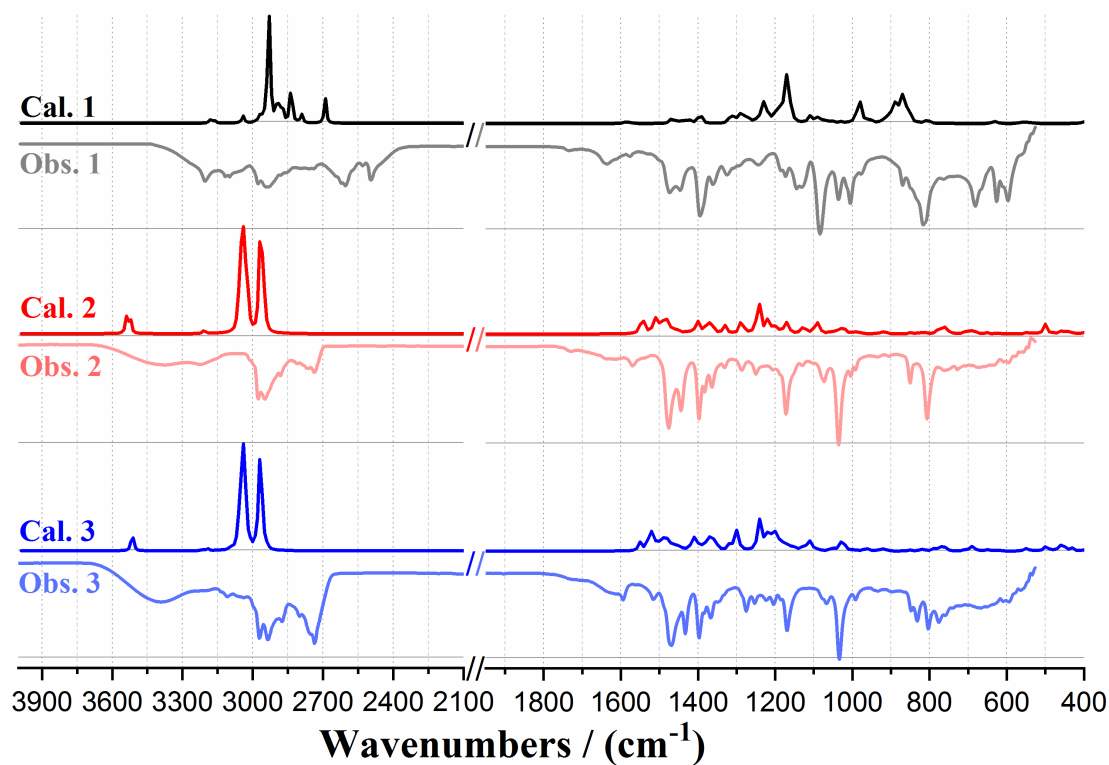

**Figure S3.** Calculated and observed FT-IR spectra of **1**, **2** and **3**. The intensity on the Y axis is normalized.

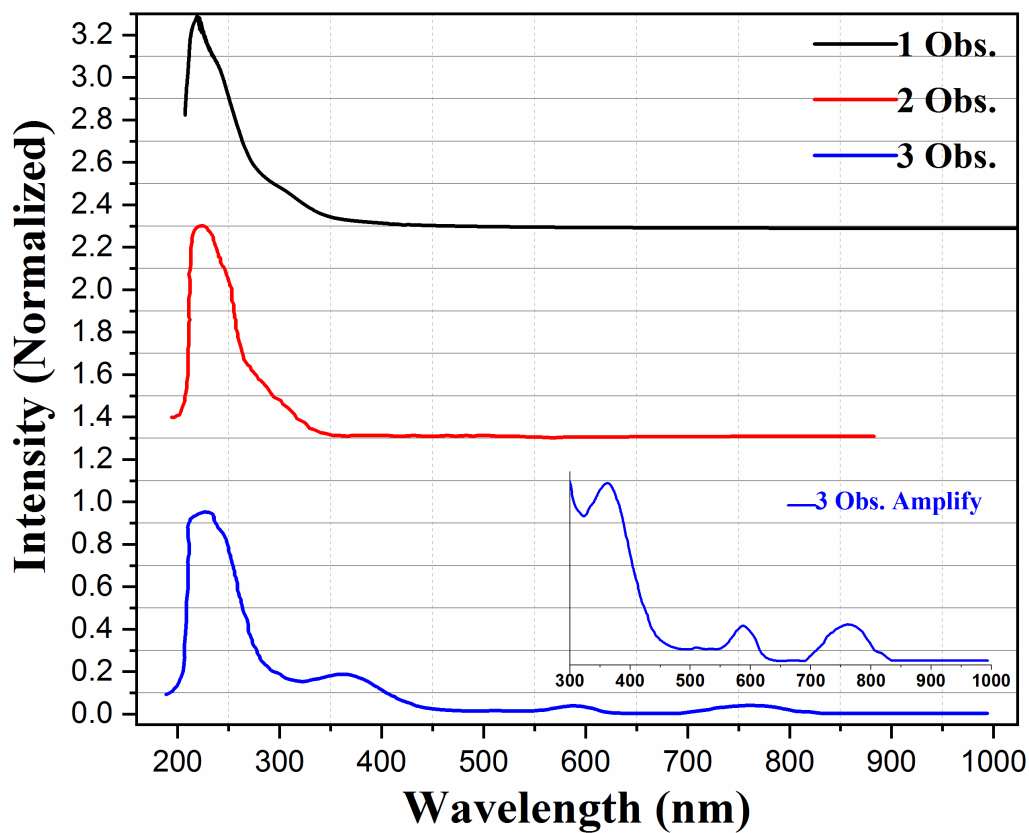

**Figure S4.** UV-vis-NIR spectra of **1** (black), **2** (red) and **3** (blue), 0.08 mM/ $\text{CH}_2\text{Cl}_2$ .

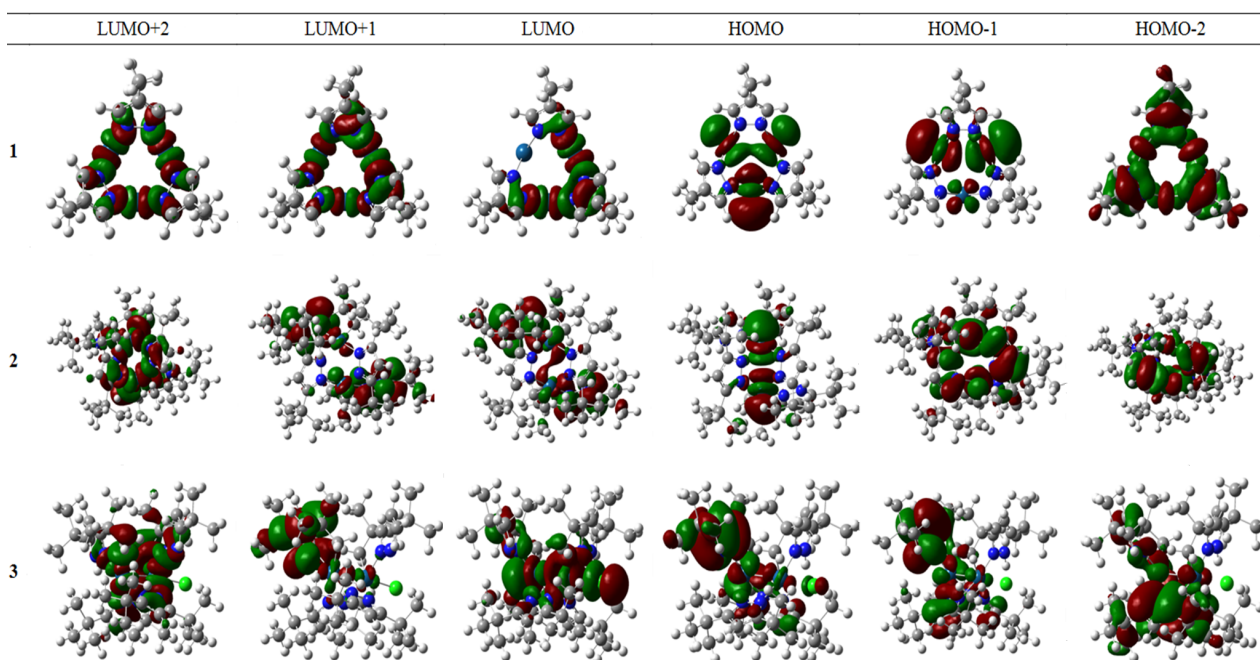

**Figure S5.** Important molecular orbitals of Pt-complexes **1**, **2** and **3**.

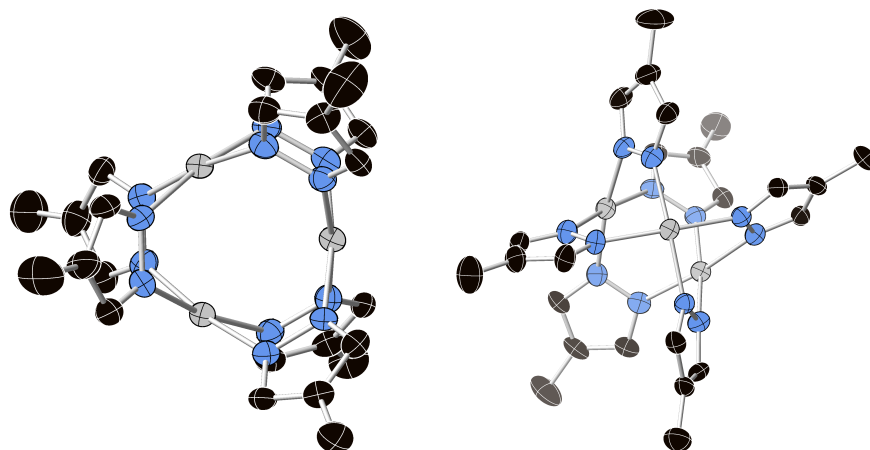

**Figure S6.** ORTEP diagram of compound **1**. H atoms are omitted for clarity.

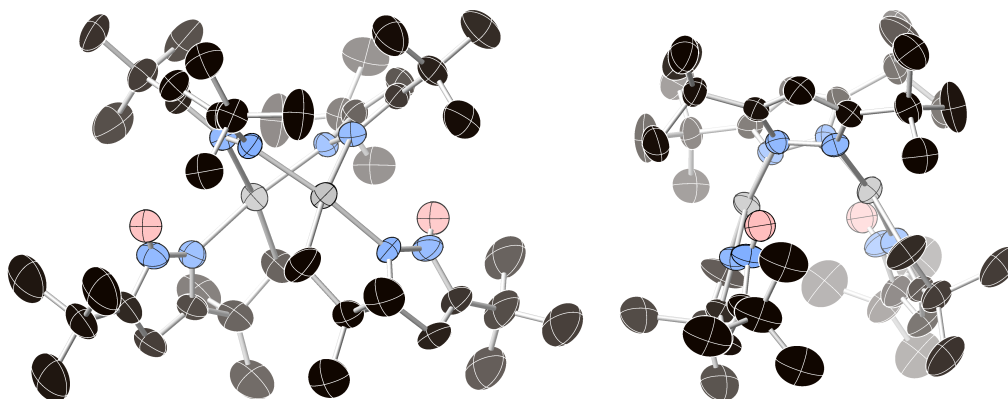

**Figure S7.** ORTEP diagram of compound **2**. C-H atoms are omitted for clarity.

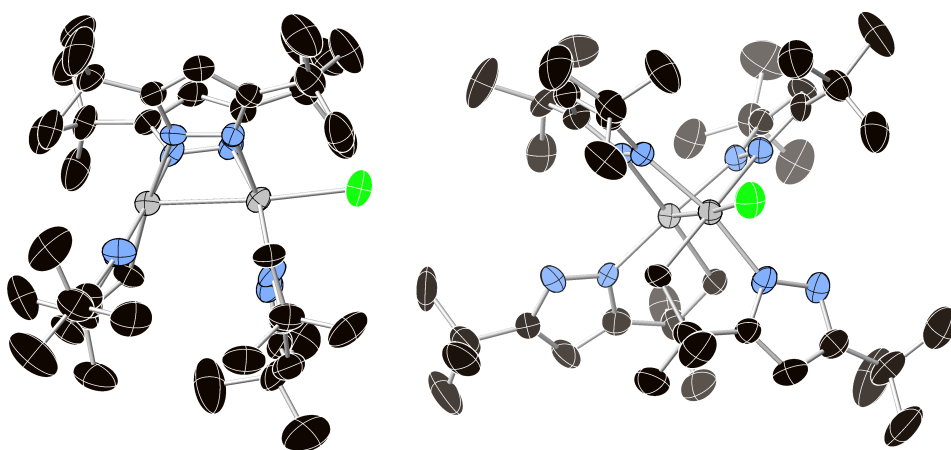

**Figure S8.** ORTEP diagram of compound **3**. H atoms are omitted for clarity.

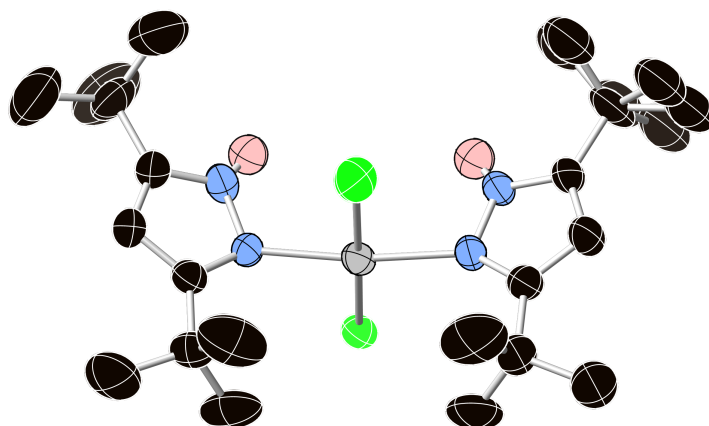

**Figure S9.** ORTEP diagram of *trans*-[PtCl<sub>2</sub>(3,5-<sup>t</sup>Bu<sub>2</sub>-pzH)<sub>2</sub>]. C-H atoms are omitted for clarity.

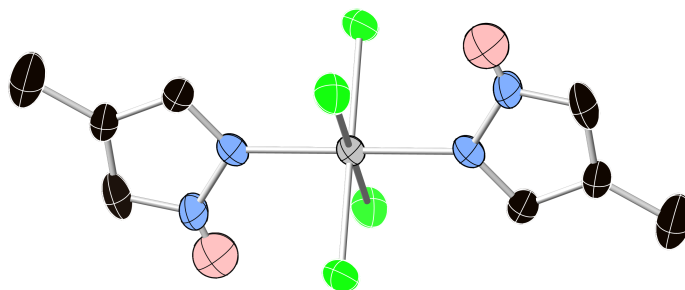

**Figure S10.** ORTEP diagram of *trans*-[PtCl<sub>2</sub>(4-Me-pzH)<sub>2</sub>]. C-H atoms are omitted for clarity.

**Table S1.** Crystallographic data for *trans*-[PtCl<sub>2</sub>(3,5-<sup>t</sup>Bu<sub>2</sub>-pzH)<sub>2</sub>] and *trans*-[PtCl<sub>2</sub>(4-Me-pzH)<sub>2</sub>].

|                                         | [PtCl <sub>2</sub> (3,5- <sup>t</sup> Bu <sub>2</sub> -pzH) <sub>2</sub> ] · CHCl <sub>3</sub> | [PtCl <sub>2</sub> (4-Me-pzH) <sub>2</sub> ]                     |
|-----------------------------------------|------------------------------------------------------------------------------------------------|------------------------------------------------------------------|
| formula                                 | C <sub>23</sub> H <sub>41</sub> Cl <sub>5</sub> N <sub>4</sub> Pt                              | C <sub>8</sub> H <sub>16</sub> N <sub>4</sub> Cl <sub>4</sub> Pt |
| crystal size, mm <sup>3</sup>           | 0.40 × 0.25 × 0.16                                                                             | 0.11 × 0.07 × 0.03                                               |
| fw                                      | 745.94                                                                                         | 505.14                                                           |
| space group                             | C2/c (No. 15)                                                                                  | Pmna (No. 53)                                                    |
| a, Å                                    | 25.360(5)                                                                                      | 7.187(6)                                                         |
| b, Å                                    | 12.569(2)                                                                                      | 8.144(3)                                                         |
| c, Å                                    | 21.115(3)                                                                                      | 12.068(10)                                                       |
| α, °                                    | 90                                                                                             | 90                                                               |
| β, °                                    | 105.715(17)                                                                                    | 90                                                               |
| γ, °                                    | 90                                                                                             | 90                                                               |
| V, Å <sup>3</sup>                       | 6479(2)                                                                                        | 706.4(9)                                                         |
| Z                                       | 8                                                                                              | 2                                                                |
| T, K                                    | 298(2)                                                                                         | 298(2)                                                           |
| ρ <sub>calcd</sub> , g cm <sup>-3</sup> | 1.529                                                                                          | 2.375                                                            |
| reflectns collected/2θ <sub>max</sub>   | 19813/56.24                                                                                    | 3126/46.58                                                       |
| Unique reflectns/I > 2σ(I)              | 5656/7941                                                                                      | 567/552                                                          |
| No. of params/restraints                | 310/114                                                                                        | 51/0                                                             |
| μ(Mo Kα), mm <sup>-1</sup>              | 4.761                                                                                          | 10.672                                                           |
| F(000)                                  | 2960                                                                                           | 476                                                              |
| R1 <sup>a</sup> / all data              | 0.0617/0.1253                                                                                  | 0.0189/0.0469                                                    |
| wR2 <sup>b</sup> (I > 2σ(I))            | 0.1406                                                                                         | 0.0492                                                           |
| Goodness of fit <sup>c</sup>            | 1.273                                                                                          | 1.101                                                            |

<sup>a</sup>  $I > 2\sigma(I)$ .  $R1 = \Sigma ||F_o| - |F_c|| / \Sigma |F_o|$ . <sup>b</sup>  $wR2 = [\Sigma[w(F_o^2 - F_c^2)^2] / \Sigma[w(F_o^2)^2]]^{1/2}$ , where  $w = 1/\sigma^2(F_o^2) + (aP)^2 + bP$ ,  $P = (F_o^2 + 2F_c^2)/3$ . <sup>c</sup>  $GoF = [\Sigma[w(F_o^2 - F_c^2)^2] / (n - p)]^{1/2}$ .

**Table S2.** Selected bond lengths(Å) and angles(°) for [PtCl<sub>2</sub>(3,5-<sup>t</sup>Bu<sub>2</sub>-pzH)<sub>2</sub>].

|             |            |            |           |
|-------------|------------|------------|-----------|
| Pt1—Cl1     | 2.297 (3)  | Pt1—N1     | 2.020 (6) |
| Pt1—Cl2     | 2.321 (2)  | Pt1—N3     | 2.004 (6) |
| Cl1—Pt1—Cl2 | 176.01 (9) | N3—Pt1—Cl2 | 92.1 (2)  |
| N1—Pt1—Cl1  | 87.7 (2)   | N3—Pt1—N1  | 172.4 (3) |
| N1—Pt1—Cl2  | 93.2 (2)   | N2—N1—Pt1  | 113.5 (5) |
| N3—Pt1—Cl1  | 86.7 (2)   | C12—N1—Pt1 | 136.9 (6) |
| N4—N3—Pt1   | 113.7 (5)  | C1—N3—Pt1  | 137.2 (6) |

**Table S3.** Selected bond lengths(Å) and angles(°) for [PtCl<sub>2</sub>(4-Me-pzH)<sub>2</sub>].

|                                           |             |                                           |             |
|-------------------------------------------|-------------|-------------------------------------------|-------------|
| Pt1—Cl1 <sup>i</sup>                      | 2.3181 (15) | Pt1—Cl1 <sup>iii</sup>                    | 2.3181 (15) |
| Pt1—Cl1 <sup>ii</sup>                     | 2.3181 (15) | Pt1—N1 <sup>iii</sup>                     | 2.019 (5)   |
| Pt1—Cl1                                   | 2.3181 (15) | Pt1—N1                                    | 2.019 (5)   |
| Cl1 <sup>i</sup> —Pt1—Cl1                 | 89.01 (8)   | N1 <sup>iii</sup> —Pt1—Cl1 <sup>iii</sup> | 90.11 (10)  |
| Cl1 <sup>i</sup> —Pt1—Cl1 <sup>ii</sup>   | 180.00 (5)  | N1 <sup>iii</sup> —Pt1—Cl1                | 89.89 (10)  |
| Cl1—Pt1—Cl1 <sup>iii</sup>                | 180.0       | N1 <sup>iii</sup> —Pt1—Cl1 <sup>i</sup>   | 89.89 (10)  |
| Cl1—Pt1—Cl1 <sup>ii</sup>                 | 90.99 (8)   | N1—Pt1—Cl1                                | 90.11 (10)  |
| Cl1 <sup>i</sup> —Pt1—Cl1 <sup>iii</sup>  | 90.99 (8)   | N1 <sup>iii</sup> —Pt1—Cl1 <sup>ii</sup>  | 90.11 (10)  |
| Cl1 <sup>iii</sup> —Pt1—Cl1 <sup>ii</sup> | 89.01 (8)   | N1—Pt1—Cl1 <sup>iii</sup>                 | 89.89 (10)  |
| N1—Pt1—Cl1 <sup>i</sup>                   | 90.11 (10)  | N1 <sup>iii</sup> —Pt1—N1                 | 180.00 (15) |
| N1—Pt1—Cl1 <sup>ii</sup>                  | 89.89 (10)  | N2—N1—Pt1                                 | 122.6 (4)   |
| C1—N1—Pt1                                 | 131.7 (5)   | N1 <sup>iii</sup> —Pt1—N1—N2              | 0.0 (6)     |
| Pt1—N1—N2—C3                              | 180.000 (2) | N1 <sup>iii</sup> —Pt1—N1—C1              | 180.0 (6)   |
| Pt1—N1—C1—C2                              | 180.000 (2) | Cl1 <sup>i</sup> —Pt1—N1—C1               | −44.50 (4)  |
| Cl1 <sup>i</sup> —Pt1—N1—N2               | 135.50 (4)  | Cl1 <sup>iii</sup> —Pt1—N1—C1             | −135.50 (4) |
| Cl1—Pt1—N1—N2                             | −135.50 (4) | Cl1 <sup>ii</sup> —Pt1—N1—C1              | 135.50 (4)  |
| Cl1 <sup>iii</sup> —Pt1—N1—N2             | 44.50 (4)   | Cl1—Pt1—N1—C1                             | 44.50 (4)   |
| Cl1 <sup>ii</sup> —Pt1—N1—N2              | −44.50 (4)  |                                           |             |

Symmetry codes: (i)  $-x, y, z$ ; (ii)  $x, -y+1, -z$ ; (iii)  $-x, -y+1, -z$



**Table S4.** Computed NBA charges and natural electron configurations of the selected atoms **1**, **2** and **3** at BP86/6-31G\*~dz.

|      | <b>1</b>       |                                                          | <b>2</b>       |                                                          | <b>3</b>       |                                                          |
|------|----------------|----------------------------------------------------------|----------------|----------------------------------------------------------|----------------|----------------------------------------------------------|
| Atom | Natural Charge | Natural Electron Configuration                           | Natural Charge | Natural Electron Configuration                           | Natural Charge | Natural Electron Configuration                           |
| Pt   | 0.47  e        | 6s <sup>0.54</sup> 5d <sup>8.66</sup> 6p <sup>0.33</sup> | 0.35  e        | 6s <sup>0.58</sup> 5d <sup>8.78</sup> 6p <sup>0.29</sup> | 0.56  e        | 6s <sup>0.51</sup> 5d <sup>8.60</sup> 6p <sup>0.33</sup> |
| Pt   | 0.44  e        | 6s <sup>0.54</sup> 5d <sup>8.68</sup> 6p <sup>0.33</sup> | 0.35  e        | 6s <sup>0.58</sup> 5d <sup>8.79</sup> 6p <sup>0.29</sup> | 0.46  e        | 6s <sup>0.46</sup> 5d <sup>8.50</sup> 6p <sup>0.57</sup> |
| Pt   | 0.43  e        | 6s <sup>0.54</sup> 5d <sup>8.70</sup> 6p <sup>0.33</sup> | —              | —                                                        | —              | —                                                        |
| Cl   | —              | —                                                        | —              | —                                                        | -0.30  e       | 3s <sup>1.88</sup> 3p <sup>5.42</sup>                    |
| N    | -0.28  e       | 2s <sup>1.33</sup> 2p <sup>3.94</sup>                    | -0.33  e       | 2s <sup>1.33</sup> 2p <sup>3.98</sup>                    | -0.24  e       | 2s <sup>1.26</sup> 2p <sup>3.96</sup>                    |
| N    | -0.35  e       | 2s <sup>1.37</sup> 2p <sup>3.96</sup>                    | -0.29  e       | 2s <sup>1.29</sup> 2p <sup>3.98</sup>                    | -0.30  e       | 2s <sup>1.31</sup> 2p <sup>3.96</sup>                    |
| N    | -0.26  e       | 2s <sup>1.31</sup> 2p <sup>3.93</sup>                    | -0.29  e       | 2s <sup>1.29</sup> 2p <sup>3.98</sup>                    | -0.32  e       | 2s <sup>1.33</sup> 2p <sup>3.96</sup>                    |
| N    | -0.31  e       | 2s <sup>1.32</sup> 2p <sup>3.96</sup>                    | -0.33  e       | 2s <sup>1.33</sup> 2p <sup>3.98</sup>                    | -0.29v         | 2s <sup>1.29</sup> 2p <sup>3.98</sup>                    |
| N    | -0.26  e       | 2s <sup>1.34</sup> 2p <sup>3.89</sup>                    | -0.26  e       | 2s <sup>1.28</sup> 2p <sup>3.95</sup>                    | -0.29  e       | 2s <sup>1.27</sup> 2p <sup>4.00</sup>                    |
| N    | -0.25  e       | 2s <sup>1.34</sup> 2p <sup>3.89</sup>                    | -0.31  e       | 2s <sup>1.20</sup> 2p <sup>4.09</sup>                    | -0.31v         | 2s <sup>1.41</sup> 2p <sup>3.88</sup>                    |
| N    | -0.28  e       | 2s <sup>1.36</sup> 2p <sup>3.89</sup>                    | -0.26  e       | 2s <sup>1.28</sup> 2p <sup>3.95</sup>                    | -0.23  e       | 2s <sup>1.26</sup> 2p <sup>3.95</sup>                    |
| N    | -0.25  e       | 2s <sup>1.32</sup> 2p <sup>3.91</sup>                    | -0.31  e       | 2s <sup>1.20</sup> 2p <sup>4.09</sup>                    | -0.31  e       | 2s <sup>1.20</sup> 2p <sup>4.09</sup>                    |
| N    | -0.31  e       | 2s <sup>1.32</sup> 2p <sup>3.96</sup>                    | —              | —                                                        | —              | —                                                        |
| N    | -0.30  e       | 2s <sup>1.36</sup> 2p <sup>3.92</sup>                    | —              | —                                                        | —              | —                                                        |
| N    | -0.29  e       | 2s <sup>1.35</sup> 2p <sup>3.92</sup>                    | —              | —                                                        | —              | —                                                        |
| N    | -0.27  e       | 2s <sup>1.30</sup> 2p <sup>3.95</sup>                    | —              | —                                                        | —              | —                                                        |
| C    | —              | —                                                        | -0.64  e       | 2s <sup>1.12</sup> 2p <sup>3.50</sup>                    | -0.62  e       | 2s <sup>1.11</sup> 2p <sup>3.49</sup>                    |
| C    | —              | —                                                        | -0.64  e       | 2s <sup>1.12</sup> 2p <sup>3.50</sup>                    | -0.50  e       | 2s <sup>1.10</sup> 2p <sup>3.38</sup>                    |

**Table S5.** Computed WBI Pt-Pt/Pt-N/Pt-C/Pt-Cl bonds in the three simplified Pt Complexes at BP86/6-31G\*~dz.

| <b>1</b> |        | <b>2</b> |        | <b>3</b> |        |
|----------|--------|----------|--------|----------|--------|
| Bond     | WBI    | Bond     | WBI    | Bond     | WBI    |
| Pt1-Pt2  | 0.0843 | Pt1-Pt2  | 0.0621 | Pt1-Pt2  | 0.2769 |
| Pt1-Pt3  | 0.0863 | Pt1-N4   | 0.3064 | Pt1-N5   | 0.1804 |
| Pt2-Pt3  | 0.0912 | Pt1-N6   | 0.2247 | Pt1-N7   | 0.2706 |
| Pt1-N4   | 0.3285 | Pt1-N7   | 0.2973 | Pt1-N8   | 0.3691 |
| Pt1-N6   | 0.2880 | Pt2-N3   | 0.2247 | Pt2-N4   | 0.3630 |
| Pt1-N13  | 0.3973 | Pt2-N5   | 0.3064 | Pt2-N6   | 0.1774 |
| Pt1-N15  | 0.3035 | Pt2-N10  | 0.2973 | Pt2-N10  | 0.2867 |
| Pt2-N5   | 0.3516 | Pt1-C33  | 0.6135 | Pt1-C33  | 0.5326 |
| Pt2-N7   | 0.3049 | Pt2-C44  | 0.6135 | Pt2-C44  | 0.5694 |
| Pt2-N8   | 0.3300 |          |        | Pt2-Cl3  | 0.0936 |
| Pt2-N10  | 0.3165 |          |        |          |        |
| Pt3-N9   | 0.2880 |          |        |          |        |
| Pt3-N11  | 0.2767 |          |        |          |        |
| Pt3-N12  | 0.2982 |          |        |          |        |
| Pt3-N14  | 0.3608 |          |        |          |        |

**Table S6.** Selected bond lengths(Å)and bond angles(°)of compound **1**.

|             |             |             |             |
|-------------|-------------|-------------|-------------|
| Pt1—Pt2     | 3.0525 (6)  | Pt4—Pt5     | 3.0397 (6)  |
| Pt1—Pt3     | 3.0648 (6)  | Pt4—Pt6     | 3.0758 (6)  |
| Pt1—N1      | 2.007 (5)   | Pt4—N13     | 2.017 (5)   |
| Pt1—N3      | 2.013 (5)   | Pt4—N15     | 2.012 (5)   |
| Pt1—N10     | 2.012 (5)   | Pt4—N22     | 2.023 (6)   |
| Pt1—N12     | 2.006 (6)   | Pt4—N24     | 2.007 (5)   |
| Pt2—Pt3     | 3.0355 (5)  | Pt5—Pt6     | 3.0384 (7)  |
| Pt2—N2      | 2.015 (5)   | Pt5—N14     | 2.009 (6)   |
| Pt2—N4      | 2.018 (5)   | Pt5—N16     | 2.009 (5)   |
| Pt2—N5      | 2.017 (5)   | Pt5—N17     | 2.015 (6)   |
| Pt2—N7      | 2.017 (6)   | Pt5—N19     | 2.013 (6)   |
| Pt3—N6      | 2.008 (5)   | Pt6—N18     | 2.017 (5)   |
| Pt3—N8      | 2.020 (5)   | Pt6—N20     | 2.025 (5)   |
| Pt3—N9      | 2.016 (6)   | Pt6—N21     | 2.014 (6)   |
| Pt3—N11     | 2.012 (5)   | Pt6—N23     | 2.018 (5)   |
| Pt2—Pt1—Pt3 | 59.501 (13) | Pt3—Pt2—Pt1 | 60.451 (12) |
| N1—Pt1—Pt2  | 65.31 (15)  | N2—Pt2—Pt1  | 65.11 (15)  |
| N1—Pt1—Pt3  | 107.89 (15) | N2—Pt2—Pt3  | 107.87 (15) |
| N1—Pt1—N3   | 87.5 (2)    | N2—Pt2—N4   | 88.2 (2)    |
| N1—Pt1—N10  | 91.8 (2)    | N2—Pt2—N5   | 91.3 (2)    |
| N3—Pt1—Pt2  | 65.33 (15)  | N2—Pt2—N7   | 172.1 (2)   |
| N3—Pt1—Pt3  | 106.53 (16) | N4—Pt2—Pt1  | 65.05 (15)  |
| N10—Pt1—Pt2 | 106.39 (15) | N4—Pt2—Pt3  | 106.78 (15) |
| N10—Pt1—Pt3 | 65.29 (15)  | N5—Pt2—Pt1  | 107.03 (14) |
| N10—Pt1—N3  | 171.1 (2)   | N5—Pt2—Pt3  | 65.23 (15)  |
| N12—Pt1—Pt2 | 108.08 (16) | N5—Pt2—N4   | 171.4 (2)   |
| N12—Pt1—Pt3 | 65.35 (16)  | N5—Pt2—N7   | 89.1 (2)    |
| N12—Pt1—N1  | 172.8 (2)   | N7—Pt2—Pt1  | 107.24 (15) |
| N12—Pt1—N3  | 92.1 (2)    | N7—Pt2—Pt3  | 65.18 (15)  |
| N12—Pt1—N10 | 87.4 (2)    | N7—Pt2—N4   | 90.2 (2)    |
| Pt2—Pt3—Pt1 | 60.049 (14) | Pt5—Pt4—Pt6 | 59.578 (16) |
| N6—Pt3—Pt1  | 107.62 (15) | N13—Pt4—Pt5 | 65.78 (16)  |
| N6—Pt3—Pt2  | 65.53 (15)  | N13—Pt4—Pt6 | 108.21 (16) |
| N6—Pt3—N8   | 88.8 (2)    | N13—Pt4—N22 | 91.4 (2)    |
| N6—Pt3—N9   | 90.7 (2)    | N15—Pt4—Pt5 | 65.62 (15)  |
| N6—Pt3—N11  | 172.1 (2)   | N15—Pt4—Pt6 | 106.01 (15) |
| N8—Pt3—Pt1  | 107.14 (15) | N15—Pt4—N13 | 88.9 (2)    |

|             |             |             |             |
|-------------|-------------|-------------|-------------|
| N8—Pt3—Pt2  | 65.66 (15)  | N15—Pt4—N22 | 170.3 (2)   |
| N9—Pt3—Pt1  | 64.38 (16)  | N22—Pt4—Pt5 | 105.82 (16) |
| N9—Pt3—Pt2  | 105.91 (15) | N22—Pt4—Pt6 | 64.75 (16)  |
| N9—Pt3—N8   | 170.9 (2)   | N24—Pt4—Pt5 | 106.93 (16) |
| N11—Pt3—Pt1 | 64.72 (17)  | N24—Pt4—Pt6 | 64.56 (16)  |
| N11—Pt3—Pt2 | 107.60 (16) | N24—Pt4—N13 | 172.2 (2)   |
| N11—Pt3—N8  | 91.7 (2)    | N24—Pt4—N15 | 90.4 (2)    |
| N11—Pt3—N9  | 87.5 (2)    | N24—Pt4—N22 | 88.0 (2)    |
| Pt6—Pt5—Pt4 | 60.801 (15) | Pt5—Pt6—Pt4 | 59.621 (13) |
| N14—Pt5—Pt4 | 65.24 (15)  | N18—Pt6—Pt4 | 107.99 (16) |
| N14—Pt5—Pt6 | 107.95 (15) | N18—Pt6—Pt5 | 65.54 (16)  |
| N14—Pt5—N16 | 89.2 (2)    | N18—Pt6—N20 | 86.6 (2)    |
| N14—Pt5—N17 | 92.4 (2)    | N18—Pt6—N23 | 172.7 (2)   |
| N14—Pt5—N19 | 172.3 (2)   | N20—Pt6—Pt4 | 107.82 (16) |
| N16—Pt5—Pt4 | 64.75 (16)  | N20—Pt6—Pt5 | 65.60 (16)  |
| N16—Pt5—Pt6 | 106.25 (16) | N21—Pt6—Pt4 | 64.51 (17)  |
| N16—Pt5—N17 | 171.6 (2)   | N21—Pt6—Pt5 | 105.87 (16) |
| N16—Pt5—N19 | 90.5 (2)    | N21—Pt6—N18 | 91.7 (2)    |
| N17—Pt5—Pt4 | 108.57 (15) | N21—Pt6—N20 | 171.2 (2)   |
| N17—Pt5—Pt6 | 65.42 (16)  | N21—Pt6—N23 | 87.6 (2)    |
| N19—Pt5—Pt4 | 107.76 (15) | N23—Pt6—Pt4 | 65.17 (15)  |
| N19—Pt5—Pt6 | 64.80 (15)  | N23—Pt6—Pt5 | 107.66 (15) |
| N19—Pt5—N17 | 86.8 (2)    | N23—Pt6—N20 | 93.0 (2)    |
| N2—N1—Pt1   | 114.8 (4)   | N1—N2—Pt2   | 114.7 (4)   |
| C3—N1—Pt1   | 137.9 (5)   | C1—N2—Pt2   | 137.2 (5)   |
| N4—N3—Pt1   | 114.7 (4)   | N3—N4—Pt2   | 115.0 (4)   |
| C7—N3—Pt1   | 137.4 (5)   | C5—N4—Pt2   | 136.3 (5)   |
| N6—N5—Pt2   | 114.6 (4)   | N5—N6—Pt3   | 114.6 (4)   |
| C11—N5—Pt2  | 136.7 (5)   | C9—N6—Pt3   | 135.8 (5)   |
| N8—N7—Pt2   | 115.2 (4)   | N7—N8—Pt3   | 113.9 (4)   |
| C15—N7—Pt2  | 135.7 (5)   | C13—N8—Pt3  | 136.6 (5)   |
| N10—N9—Pt3  | 116.0 (4)   | N9—N10—Pt1  | 114.3 (4)   |
| C19—N9—Pt3  | 135.7 (5)   | C17—N10—Pt1 | 136.9 (5)   |
| N12—N11—Pt3 | 115.4 (4)   | N11—N12—Pt1 | 114.5 (4)   |
| C23—N11—Pt3 | 136.7 (5)   | C21—N12—Pt1 | 137.4 (5)   |
| N14—N13—Pt4 | 113.6 (4)   | N13—N14—Pt5 | 115.4 (4)   |
| C27—N13—Pt4 | 137.7 (5)   | C25—N14—Pt5 | 136.8 (5)   |
| N16—N15—Pt4 | 113.7 (4)   | N15—N16—Pt5 | 115.9 (4)   |

|             |           |             |           |
|-------------|-----------|-------------|-----------|
| C31—N15—Pt4 | 136.6 (5) | C29—N16—Pt5 | 134.8 (5) |
| N18—N17—Pt5 | 114.8 (4) | N17—N18—Pt6 | 114.3 (4) |
| C35—N17—Pt5 | 137.4 (5) | C33—N18—Pt6 | 138.4 (5) |
| N20—N19—Pt5 | 116.2 (4) | N19—N20—Pt6 | 113.4 (4) |
| C39—N19—Pt5 | 134.9 (5) | C37—N20—Pt6 | 139.0 (5) |
| N22—N21—Pt6 | 116.0 (4) | N21—N22—Pt4 | 114.8 (4) |
| C43—N21—Pt6 | 135.3 (5) | C41—N22—Pt4 | 136.7 (5) |
| N24—N23—Pt6 | 114.0 (4) | N23—N24—Pt4 | 116.3 (4) |
| C47—N23—Pt6 | 138.0 (5) | C45—N24—Pt4 | 136.2 (5) |

**Table S7.** Selected bond lengths(Å)and bond angles(°)of compound **2**.

|                |            |               |            |
|----------------|------------|---------------|------------|
| Pt1—Pt2        | 2.9290 (5) | Pt2—N1        | 2.151 (7)  |
| Pt1—N2         | 2.034 (7)  | Pt2—N3        | 2.026 (7)  |
| Pt1—N4         | 2.157 (7)  | Pt2—N7        | 1.961 (8)  |
| Pt1—N5         | 1.961 (7)  | Pt2—C44       | 2.034 (10) |
| Pt1—C33        | 2.048 (10) |               |            |
| N2—Pt1—Pt2     | 71.0 (2)   | N1—Pt2—Pt1    | 64.94 (19) |
| N2—Pt1—N4      | 89.2 (3)   | N3—Pt2—Pt1    | 71.2 (2)   |
| N2—Pt1—C33     | 98.7 (4)   | N3—Pt2—N1     | 89.3 (3)   |
| N4—Pt1—Pt2     | 64.7 (2)   | N3—Pt2—C44    | 98.6 (4)   |
| N5—Pt1—Pt2     | 102.2 (2)  | N7—Pt2—Pt1    | 102.5 (2)  |
| N5—Pt1—N2      | 172.2 (3)  | N7—Pt2—N1     | 91.9 (3)   |
| N5—Pt1—N4      | 91.2 (3)   | N7—Pt2—N3     | 172.3 (3)  |
| N5—Pt1—C33     | 80.1 (4)   | N7—Pt2—C44    | 79.3 (4)   |
| C33—Pt1—Pt2    | 111.8 (5)  | C33—Pt1—N4    | 169.9 (4)  |
| C44—Pt2—Pt1    | 110.7 (4)  | N2—N1—Pt2     | 112.8 (5)  |
| C44—Pt2—N1     | 169.2 (4)  | C3—N1—Pt2     | 138.3 (6)  |
| N1—N2—Pt1      | 108.9 (5)  | N4—N3—Pt2     | 109.0 (5)  |
| C1—N2—Pt1      | 142.1 (7)  | C14—N3—Pt2    | 141.9 (7)  |
| N3—N4—Pt1      | 112.8 (5)  | C12—N4—Pt1    | 137.5 (6)  |
| N6—N5—Pt1      | 129.8 (6)  | N8—N7—Pt2     | 130.1 (6)  |
| C25—N5—Pt1     | 120.6 (6)  | C36—N7—Pt2    | 120.7 (7)  |
| Pt1—N2—C1—C2   | 172.4 (8)  | Pt2—N1—N2—Pt1 | 16.6 (6)   |
| Pt1—N2—C1—C4   | −9.8 (17)  | Pt2—N1—N2—C1  | −167.7 (6) |
| Pt1—N4—C12—C13 | 162.3 (7)  | Pt2—N1—C3—C2  | 163.6 (7)  |
| Pt1—N4—C12—C15 | −23.2 (14) | Pt2—N1—C3—C8  | −21.2 (15) |

|                  |             |                  |             |
|------------------|-------------|------------------|-------------|
| Pt1—N5—N6—C23    | −166.4 (7)  | Pt2—N3—N4—Pt1    | 16.5 (6)    |
| Pt1—N5—C25—C24   | 168.0 (7)   | Pt2—N3—N4—C12    | −176.1 (5)  |
| Pt1—N5—C25—C30   | −8.8 (12)   | Pt2—N3—C14—C13   | 174.3 (8)   |
| Pt2—N7—N8—C34    | −166.0 (8)  | Pt2—N3—C14—C19   | −7.6 (17)   |
| Pt2—N7—C36—C35   | 167.9 (7)   | C3—N1—N2—Pt1     | −174.4 (6)  |
| Pt2—N7—C36—C41   | −9.4 (13)   | C14—N3—N4—Pt1    | −166.8 (6)  |
| C25—C30—C33—Pt1  | −9.2 (13)   | C36—C41—C44—Pt2  | −13.0 (14)  |
| C31—C30—C33—Pt1  | −144.6 (15) | C42—C41—C44—Pt2  | −153.1 (17) |
| C32—C30—C33—Pt1  | 97.9 (14)   | C43—C41—C44—Pt2  | 92.5 (14)   |
| C43A—C41—C44—Pt2 | 114.2 (16)  | C31A—C30—C33—Pt1 | −119.0 (13) |
| C42A—C41—C44—Pt2 | −129.2 (14) | C32A—C30—C33—Pt1 | 122.7 (16)  |

**Table S8.** Selected bond lengths(Å)and bond angles(°)of compound **3**.

|            |           |             |             |
|------------|-----------|-------------|-------------|
| Pt1—Pt2    | 2.584 (3) | Pt3—Pt4     | 2.5858 (18) |
| Pt1—N1     | 2.124 (7) | Pt3—Cl2     | 2.346 (3)   |
| Pt1—N3     | 2.025 (7) | Pt3—N10     | 2.054 (7)   |
| Pt1—N7     | 1.992 (7) | Pt3—N12     | 2.220 (7)   |
| Pt1—C44    | 2.060 (8) | Pt3—N13     | 2.015 (7)   |
| Pt2—Cl1    | 2.352 (3) | Pt3—C77     | 2.064 (9)   |
| Pt2—N2     | 2.053 (7) | Pt4—N9      | 2.138 (7)   |
| Pt2—N4     | 2.221 (7) | Pt4—N11     | 2.031 (7)   |
| Pt2—N5     | 1.988 (7) | Pt4—N15     | 1.972 (7)   |
| Pt2—C33    | 2.078 (9) | Pt4—C88     | 2.068 (9)   |
| N1—Pt1—Pt2 | 70.5 (2)  | C44—Pt1—Pt2 | 104.8 (3)   |
| N3—Pt1—Pt2 | 74.9 (2)  | C44—Pt1—N1  | 174.6 (3)   |
| N3—Pt1—N1  | 88.2 (3)  | Cl1—Pt2—Pt1 | 174.92 (7)  |
| N3—Pt1—C44 | 93.2 (3)  | N2—Pt2—Pt1  | 76.4 (2)    |
| N7—Pt1—Pt2 | 106.8 (2) | N2—Pt2—Cl1  | 102.4 (2)   |
| N7—Pt1—N1  | 98.4 (3)  | N2—Pt2—N4   | 89.5 (3)    |
| N7—Pt1—N3  | 173.3 (3) | N2—Pt2—C33  | 91.3 (3)    |
| N7—Pt1—C44 | 80.1 (3)  | N4—Pt2—Pt1  | 71.79 (19)  |
| N4—Pt2—Cl1 | 103.3 (2) | C33—Pt2—Pt1 | 97.8 (3)    |
| N5—Pt2—Pt1 | 95.7 (2)  | C33—Pt2—Cl1 | 87.2 (3)    |
| N5—Pt2—Cl1 | 86.1 (2)  | C33—Pt2—N4  | 169.0 (3)   |
| N5—Pt2—N2  | 168.4 (3) | Cl2—Pt3—Pt4 | 174.70 (8)  |

|             |            |              |           |
|-------------|------------|--------------|-----------|
| N5—Pt2—N4   | 96.2 (3)   | N5—Pt2—C33   | 81.2 (3)  |
| N10—Pt3—Pt4 | 76.59 (19) | N12—Pt3—Pt4  | 71.6 (2)  |
| N10—Pt3—Cl2 | 101.5 (2)  | N12—Pt3—Cl2  | 103.6 (2) |
| N10—Pt3—N12 | 89.0 (3)   | N13—Pt3—Pt4  | 95.6 (2)  |
| N10—Pt3—C77 | 91.2 (3)   | N13—Pt3—Cl2  | 87.1 (2)  |
| C77—Pt3—Pt4 | 98.0 (3)   | N13—Pt3—N10  | 168.1 (3) |
| C77—Pt3—Cl2 | 86.9 (3)   | N13—Pt3—N12  | 97.1 (3)  |
| C77—Pt3—N12 | 169.3 (4)  | N13—Pt3—C77  | 80.9 (3)  |
| N9—Pt4—Pt3  | 70.18 (19) | Pt1—C44—H44A | 109.4     |
| N11—Pt4—Pt3 | 75.1 (2)   | Pt1—C44—H44B | 109.4     |
| N11—Pt4—N9  | 87.6 (3)   | C41—C44—Pt1  | 111.3 (6) |
| N11—Pt4—C88 | 95.3 (3)   | N10—N9—Pt4   | 109.2 (5) |
| N15—Pt4—Pt3 | 109.1 (2)  | C47—N9—Pt4   | 142.9 (6) |
| N15—Pt4—N9  | 97.3 (3)   | N9—N10—Pt3   | 103.9 (5) |
| N15—Pt4—N11 | 174.3 (3)  | C45—N10—Pt3  | 146.8 (6) |
| N15—Pt4—C88 | 80.0 (3)   | N12—N11—Pt4  | 110.9 (5) |
| C88—Pt4—Pt3 | 105.3 (3)  | C58—N11—Pt4  | 139.1 (6) |
| C88—Pt4—N9  | 173.9 (3)  | N11—N12—Pt3  | 102.4 (5) |
| N2—N1—Pt1   | 109.2 (5)  | C56—N12—Pt3  | 150.2 (6) |
| C3—N1—Pt1   | 141.8 (6)  | N14—N13—Pt3  | 133.7 (6) |
| N1—N2—Pt2   | 103.9 (5)  | C69—N13—Pt3  | 118.5 (6) |
| C1—N2—Pt2   | 147.7 (6)  | Pt4—N15—H15  | 90.7      |
| N4—N3—Pt1   | 111.6 (5)  | N16—N15—Pt4  | 132.0 (6) |
| C14—N3—Pt1  | 139.6 (6)  | N6—N5—Pt2    | 133.0 (5) |
| N3—N4—Pt2   | 101.7 (5)  | C25—N5—Pt2   | 119.6 (5) |
| C12—N4—Pt2  | 149.5 (6)  | N8—N7—Pt1    | 131.0 (5) |
| C36—N7—Pt1  | 118.2 (6)  |              |           |

---
